# Supplementary material
Source: Royal Society of Chemistry journal article supplement (doi:10.1039/d6dt00514d)
Supplement: d6dt00514d1.pdf [file d6dt00514d1.pdf]

1 **Supporting Information**

2 **Sustainable AgFeO<sub>2</sub>–Carbon Nanohybrids derived from Agricultural Waste for**  
3 **High-Performance Supercapacitors in Alkaline Environments and Multifunctional**  
4 **Biomedicine**

5 **Godwin Daniel Thomas Raj S<sup>b</sup>, Monica Thomas<sup>a</sup>, Asisi Janifer<sup>a\*</sup>, J. Judith Vijaya<sup>b\*</sup>**

6 *<sup>a</sup>Department of Physics, Stella Maris College, Chennai, 600 086, Tamil Nadu, India*

7 *<sup>b</sup>Catalysis and Nanomaterials Research Laboratory, Department of Chemistry, Loyola*  
8 *College, Chennai, 600 034, Tamil Nadu, India*

9

10 *\*Corresponding Author: J. Judith Vijaya*

11 *Email: [judithvijaya78@gmail.com](mailto:judithvijaya78@gmail.com), [judithvijaya@loyolacollege.edu](mailto:judithvijaya@loyolacollege.edu)*

12 *\*Corresponding Author: Asisi Janifer*

13 *[asisijanifer@stellamariscollege.edu.in](mailto:asisijanifer@stellamariscollege.edu.in) (equal contribution)*

14

15 **Electrochemical Kinetics Analysis**

16 The capacitive and diffusion-controlled contributions to the total charge storage were  
17 quantified using the power-law relationship, typically expressed as  $i(V) = k_1v + k_2v^{1/2}$ . As  
18 illustrated, a distinct transition in the charge storage mechanism is observed as the scan rate  
19 increases. At the lowest scan rate, the diffusion-controlled process contributes 64.13 % of  
20 the total capacity, indicating that the electrolyte ions have sufficient time to penetrate the  
21 bulk lattice or undergo slow faradaic reactions.

22 However, as the scan rate progresses, the capacitive contribution increases from 35.87 %  
23 to a dominant 77.93 %. This trend signifies that at higher power densities, the surface-  
24 controlled processes comprising both double-layer capacitance and surface pseudo  
25 capacitance dictate the electrochemical performance. The sharp increase in capacitive  
26 contribution between 44.13 % to 58. 20% intervals mark the threshold where the system  
27 shifts from a diffusion-limited to a surface-controlled regime. This high capacitive  
28 contribution at higher scan rates is a hallmark of excellent rate capability. It suggests that  
29 the electrode material possesses a highly accessible surface area and shortened ion diffusion  
30 paths, making it an ideal candidate for high-power energy storage applications where rapid  
31 charge-discharge cycles are required. This analysis is performed using the Dunn's method,  
32 based on the power-law equation (1).

33  $i(V) = k_1v + k_2v^{1/2}$  (1)

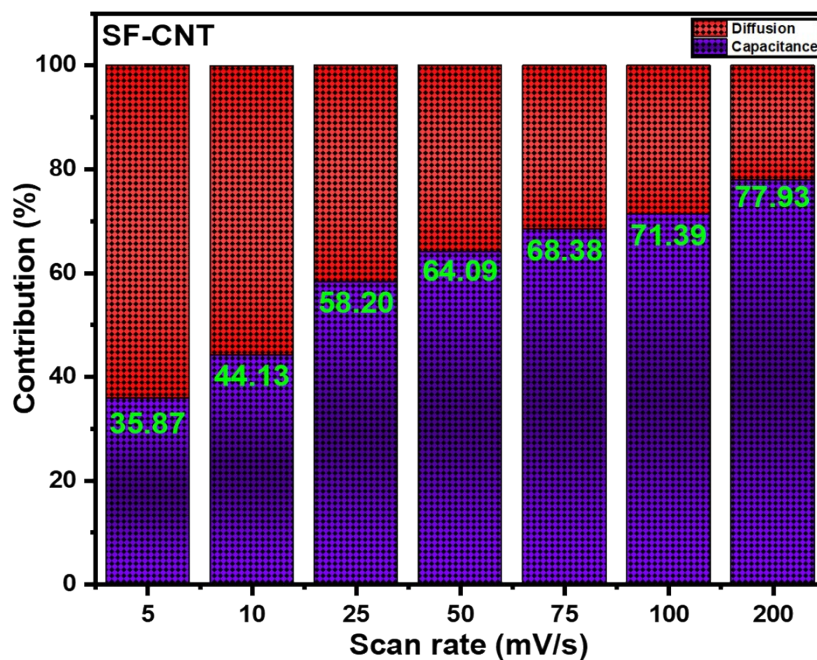

34

35 **Fig. S1.** Kinetic analysis of the charge storage mechanism. Normalized contribution ratio  
 36 of surface-controlled capacitive and diffusion-limited processes at varying scan rates (5-  
 37 200 mV/s), derived via the Dunn's method.

38

39 **References:**

40 1 K. S. Modi, P. B. Patel, D. Patel, J. Patel, V. Solanki and M. H. Patel, *Physical*  
 41 *Chemistry Chemical Physics*, 2026, **28**, 4007–4022.

42
